# Supplementary material for: Generation of long, fully modified, and serum-resistant oligonucleotides by rolling circle amplification
Source: Royal Society of Chemistry journal article supplement (doi:10.1039/c5ob01540e), 2015-01-01
Supplement: c5ob01540e1.pdf [file c5ob01540e1.pdf]

## SUPPORTING INFORMATION

### Generation of long, fully modified, and serum-resistant oligonucleotides by rolling circle amplification

*Marcel Hollenstein\**

Department of Chemistry and Biochemistry, University of Bern, Freiestrasse 3,  
3012 Bern, Switzerland.

#### Table of Contents:

|                                                          |      |
|----------------------------------------------------------|------|
| 1. General experimental section                          | 2    |
| 2. Additional procedures                                 | 3    |
| 3. Additional gel images and quantifying autoradiography | 4-23 |
| 4. References                                            | 24   |

## 1. General experimental section:

The base modified nucleoside triphosphates dA<sup>Hs</sup>TP (1), dU<sup>POH</sup>TP (2), dC<sup>Val</sup>TP (3), and the modified dUTP analogs **S1-S4** were synthesized according to literature protocols.<sup>[1, 2]</sup> 7-deaza-dGTP (4), 2'-fluoro-rNTPs (5), and  $\alpha$ -thio-dNTPs (6) were purchased from TriLink. The purity of all triphosphates was verified by RP-HPLC using an Äkta<sup>TM</sup> basic 10/100 system (Amersham Pharmacia Biotech) equipped with a Phenomenex Jupiter analytical RP-HPLC column (10 $\mu$  C4 300Å).

Vent (*exo*<sup>-</sup>) DNA polymerase, DNA polymerase I, Large (Klenow) Fragment, 9°N<sub>m</sub> DNA polymerase,  $\phi$ 29 DNA polymerase, exonuclease I, and the low molecular weight DNA ladder were all purchased from New England Biolabs. The *Pwo* DNA polymerase was purchased from Peqlab. T4 Polynucleotide kinase, *Pfu* DNA polymerase, and T4 DNA Ligase were purchased from Promega. Sequenase Version 2.0 was purchased from Affymetryx. S1 nuclease and T4 PNK were bought from Thermo Scientific. CircLigase<sup>TM</sup> II ssDNA Ligase was obtained from Epicentre. Heat-deactivated Fetal Bovine Serum was purchased from Gibco.  $\gamma$ -<sup>32</sup>P-ATP was purchased from Hartmann Analytic and the natural dNTPs from Promega. Oligonucleotides were purchased from Microsynth and gel purified (PAGE 15-20%) prior to use. Acrylamide/bisacrylamide (19:1, 40%) was obtained from Serva. Radioactivity was detected using a Storm 820 phosphorimager with the ImageQuant software (both from GE Healthcare).

### Oligonucleotides used (shown 5' to 3'):

**P1:** CTAACCCTAACCCTAACC

**P2:** TAGACCAAGGCAATCCGTA

**P3:** GTTAGGGTTAGGGTTAGG

**T1:** 5'-phosphate-TAGGGTTAG(GGTTAG)<sub>4</sub>GGTTAGGGT

**T2:** 5'-phosphate-TAGGGTTAG(GGTTAG)<sub>5</sub>GGTTAGGGT

**T3:** 5'-phosphate-TAGGGTTAG(GGTTAG)<sub>6</sub>GGTTAGGGT

**T4:** 5'-phosphate-CTTGGTCTACTGGAGN<sub>20</sub>CTACGGATTGC

**T5:** 5'-phosphate-CTTGGTCTACTGGAGAGGTGCAGGTCGTTGTAGCTAGCCTGGAGAGCACTACGGATTGC

## 2. Additional procedures

### General procedure for ligation with T4 DNA ligase:

Primer **P2** (7 nmoles) and template **T4** or **T5** (5 nmoles) were annealed by heating to 95°C and then gradually cooling to room temperature. 100 µL T4 DNA ligase buffer 10X (300 mM Tris-HCl (pH 7.8), 100 mM MgCl<sub>2</sub>, 100 mM DTT, and 10 mM ATP), 2 µL BSA, and 40 U of T4 DNA ligase were then added to the annealed oligonucleotides for a total reaction volume of 1 mL. The reaction mixture was then incubated at 16°C for 12 h. Following heat deactivation (80°C, 10 min), the mixture was evaporated to dryness. The ligated oligonucleotide was precipitated (EtOH) and gel purified (PAGE 20%). The bands corresponding to products were then eluted (crush and soak method using a buffer consisting of LiClO<sub>4</sub> 1%, NEt<sub>3</sub> 1 mM, pH 8), precipitated (EtOH), and desalted (G10 spin columns). 300-350 pmol of the circular templates **cT4** and **cT5** were regularly obtained (A<sub>260</sub> measurement). Circularity was confirmed by exonuclease I treatment (data not shown).

### Sequencing of the RCA product:

First, the general protocol for rolling circle amplification with natural dNTPs was applied. The resulting product was diluted to 40 µL and extracted with 40 µL phenol/chloroform. The reaction mixture was then precipitated with EtOH (400 µL) and passed through a spin column (30k cutoff, from Millipore) and stored in 15 µL H<sub>2</sub>O. The 5'-[<sup>32</sup>P]-labeled primer **P3** was annealed in Sequenase buffer 5x to the RCA product. A mixture of natural dNTPs (175 µM final concentration) and DTT (4.5 mM final concentration) was then added to the annealed oligonucleotides. The resulting solutions were then split into 6 eppendorfs for the different sequencing reactions. 4 of these vials contained each of the dideoxynucleoside triphosphates (ddNTPs, 20 µM final concentration), while one eppendorf only contained water (negative control), and the last was used for the positive control. A 1:5:1 mixture of thermostable inorganic pyrophosphatase (1.2 U/reaction), Sequenase diluent, and Sequenase Version 2.0 (5.2 U/reaction) was added to the vials as a cocktail at 4°C, for a final volume of 10 µL. The reaction mixtures were then incubated at 37°C for 15 min and quenched by adding of 10 µL of stop solution. The reaction mixtures were subjected to gel electrophoresis in 7% denaturing polyacrylamide gel containing TBE 1x buffer (pH 8) and 7 M urea (Figure S14). Visualization was performed by phosphorimaging.

### 3. Additional gel images and quantifying autoradiography:

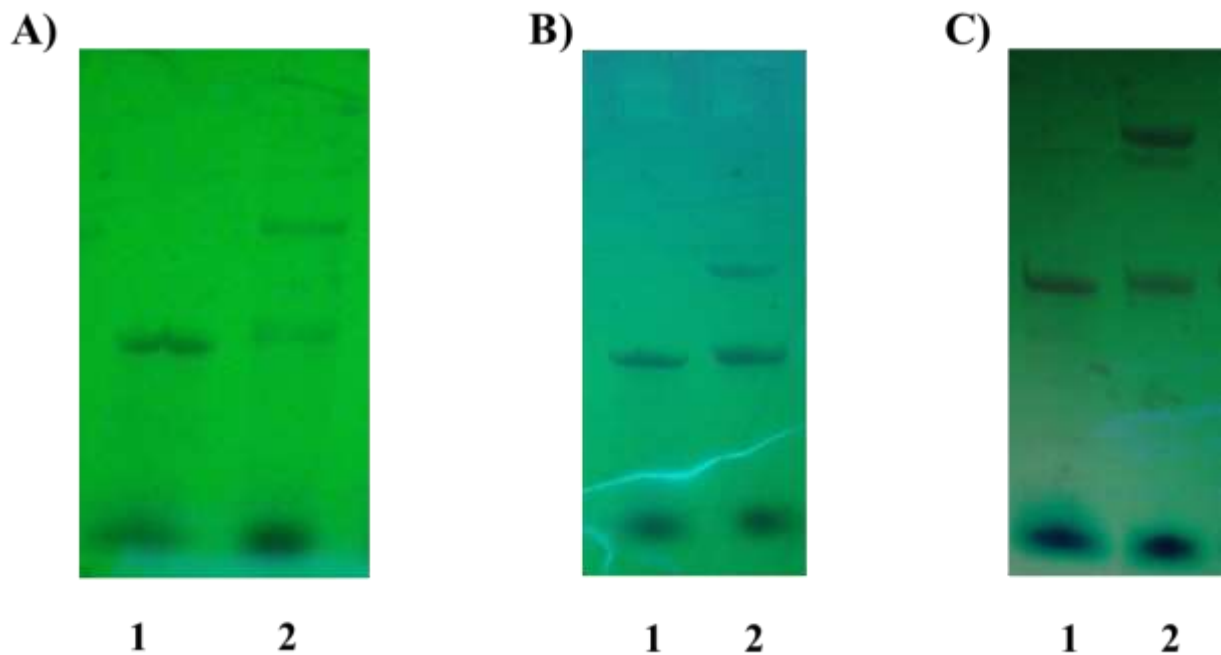

**Figure S1.** Gel images (PAGE 20%) of the circularization reactions with Circligase™ (UV shadowing) and linear precursors **T1** (Gel A), **T2** (Gel B) and **T3** (Gel C). Lane 1: linear precursor; lane 2: reaction mixture. The top bands correspond to the circular DNA templates and present a substantial reduction of mobility. The bands corresponding to the linear templates in lanes 2 present a slightly reduced gel mobility compared to the starting oligonucleotides since these are the 5'-adenylylated intermediates of the linear precursors.

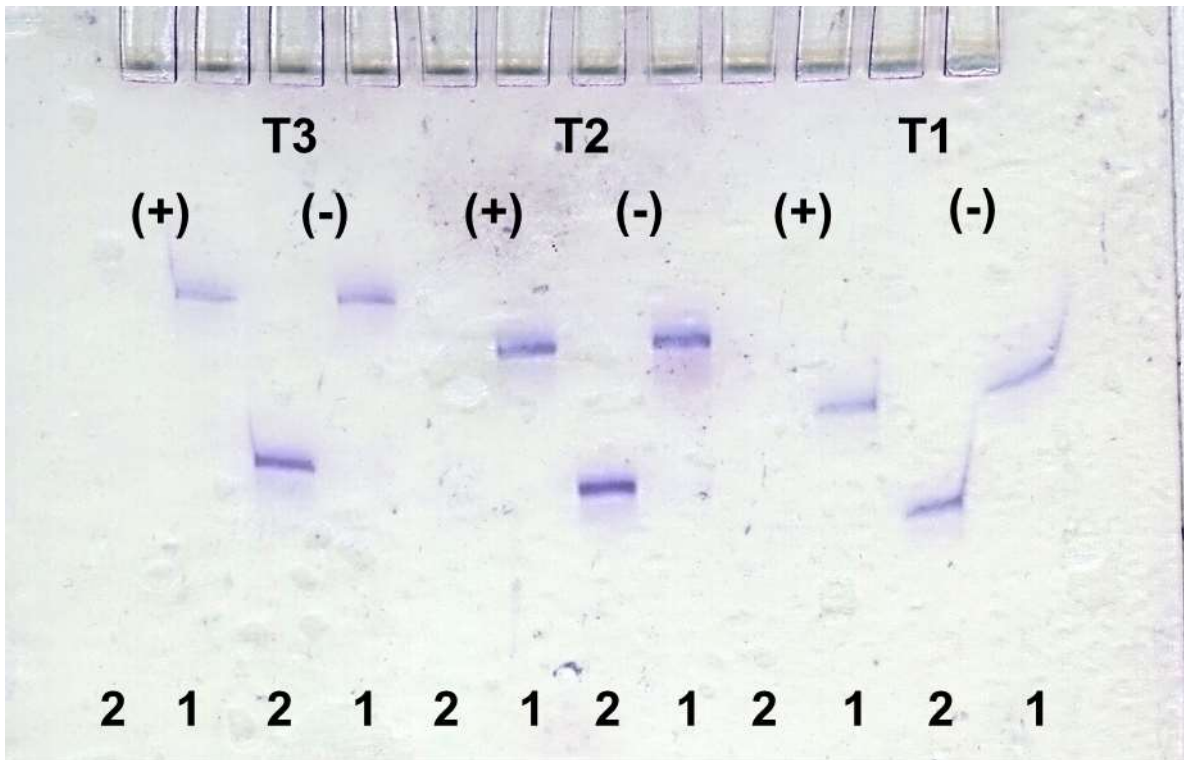

**Figure S2.** Gel image (PAGE 20%; visualized with stains-all) of the circular templates **cT1-3** and linear oligonucleotides **T1-3** with (+) and without (-) exonuclease I treatment. Lanes 1: gel purified circular templates; lanes 2: linear templates.

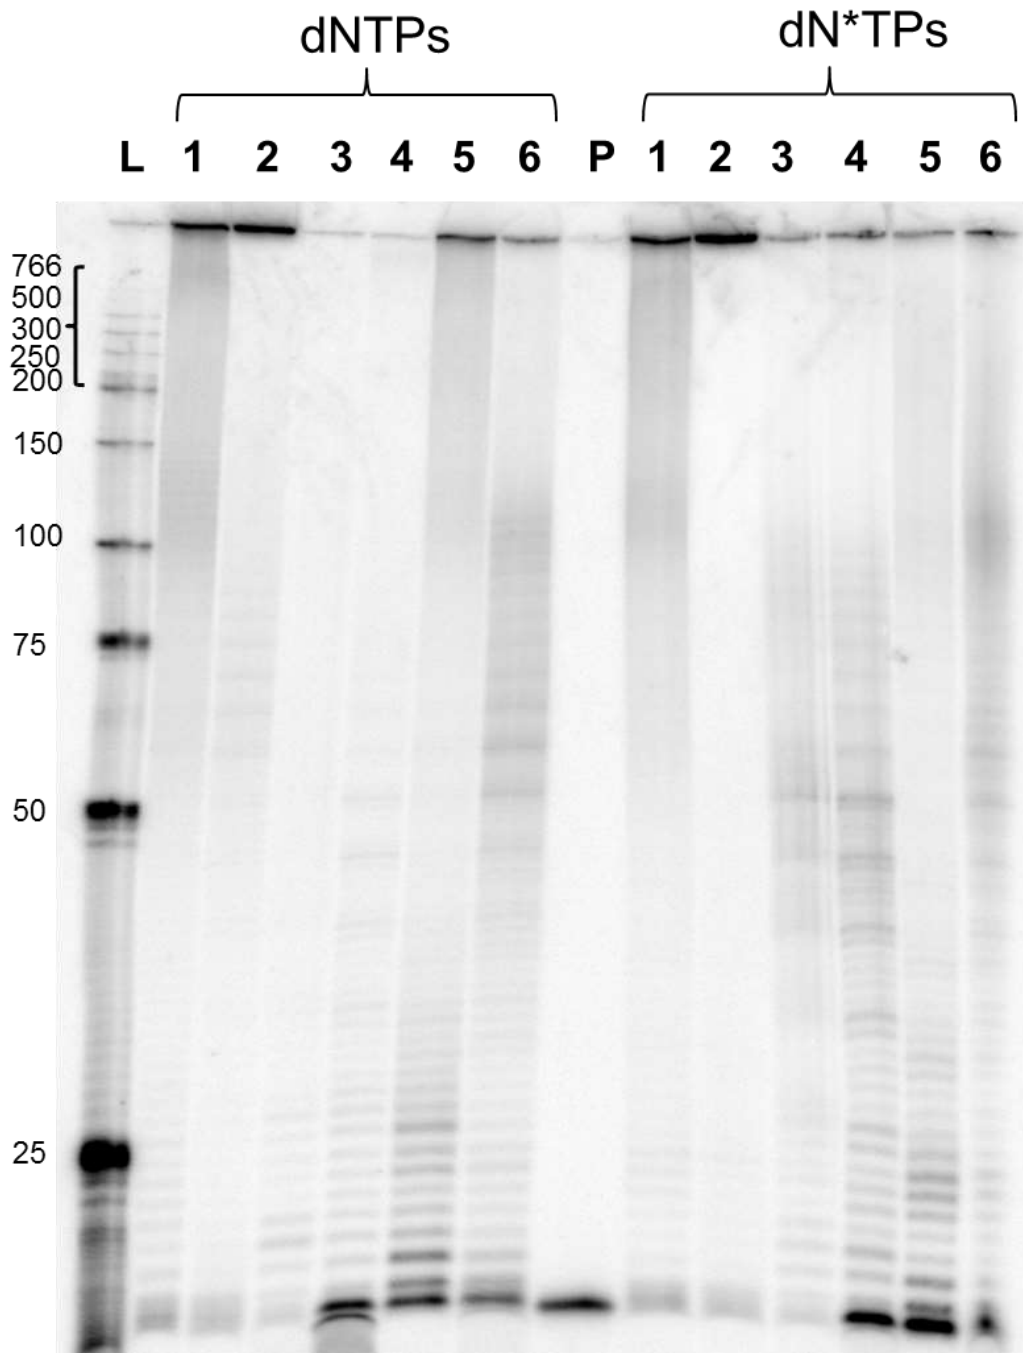

**Figure S3.** Gel image (PAGE 10%) of the products from the rolling circle amplification with circular template **cT3** and  $\alpha$ -thio dNTPs **6** (the close-up view of this gel is shown in Fig. 2A of the manuscript). DNA polymerases used: lane 1: Vent (*exo*<sup>-</sup>); lane 2: 9°N<sub>m</sub>; lane 3: Klenow fragment; lane 4:  $\Phi$ 29; lane 5: *Pfu*; lane 6: *Pwo*; P = control without polymerase; L: low molecular weight DNA ladder.

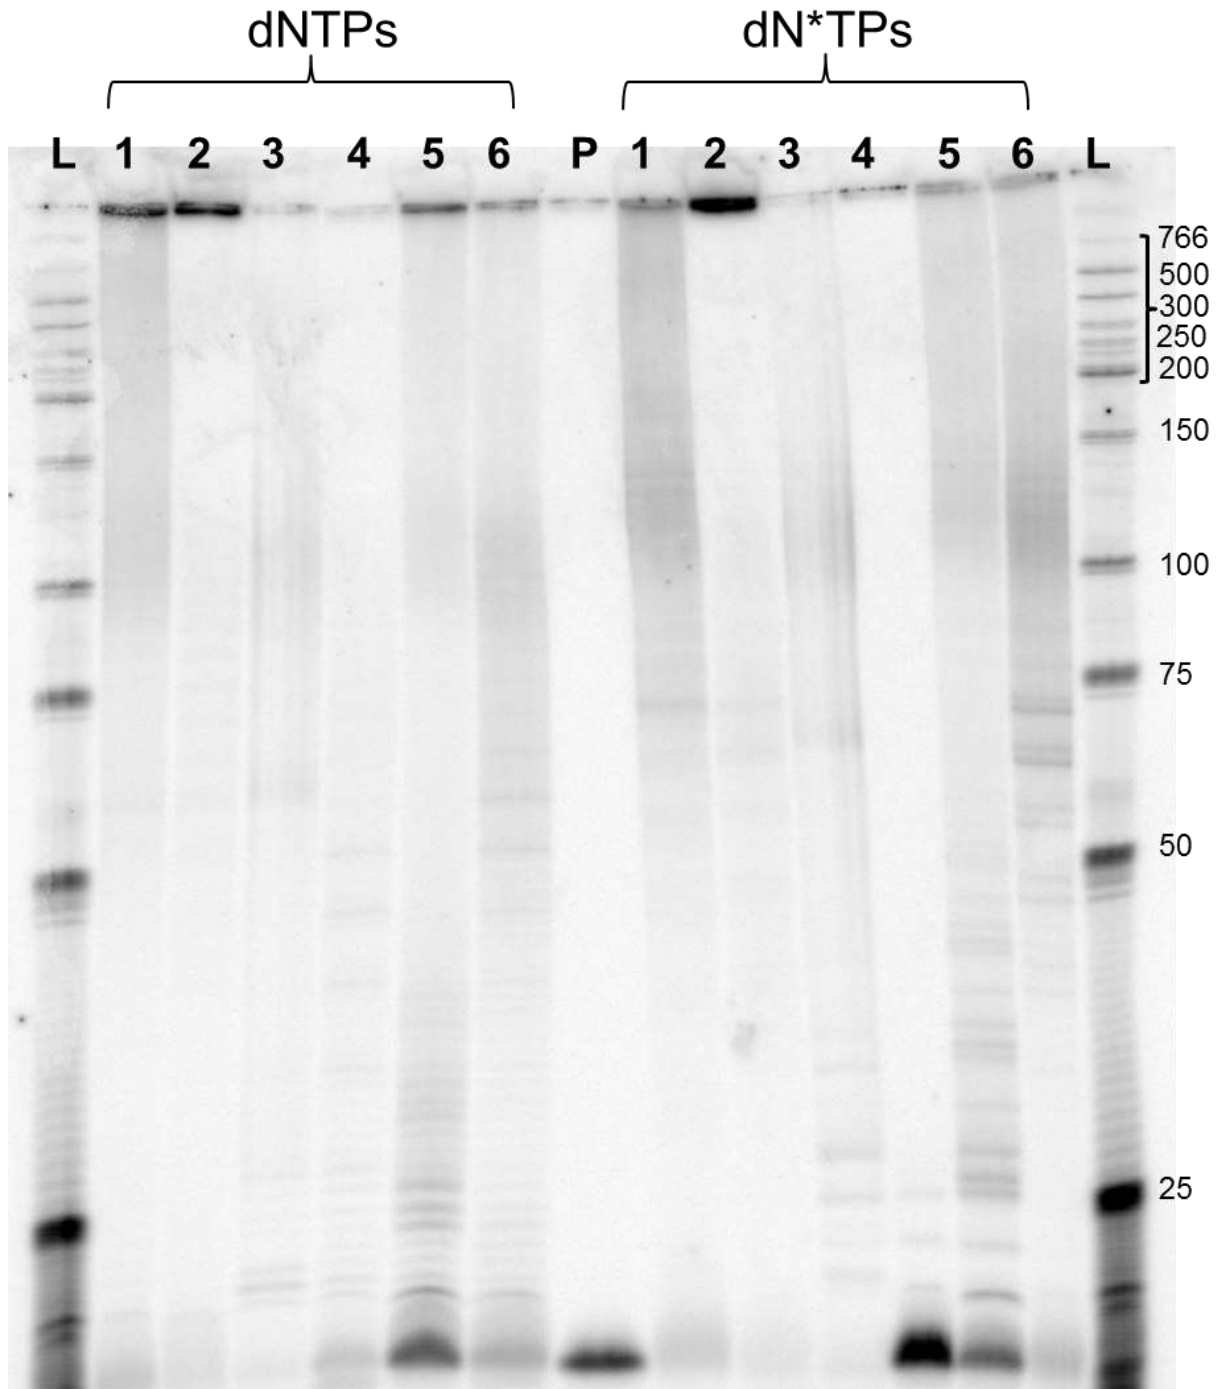

**Figure S4.** Gel image (PAGE 10%) of the products from the rolling circle amplification with circular template **cT3** and base-modified dNTPs **1-3** (the close-up view of this gel is shown in Fig. 2B of the manuscript). DNA polymerases used: lane 1: Vent (*exo*<sup>-</sup>); lane 2: 9°N<sub>m</sub>; lane 3: Klenow fragment; lane 4: Φ29; lane 5: *Pfu*; lane 6: *Pwo*; P = control without polymerase; L: low molecular weight DNA ladder.

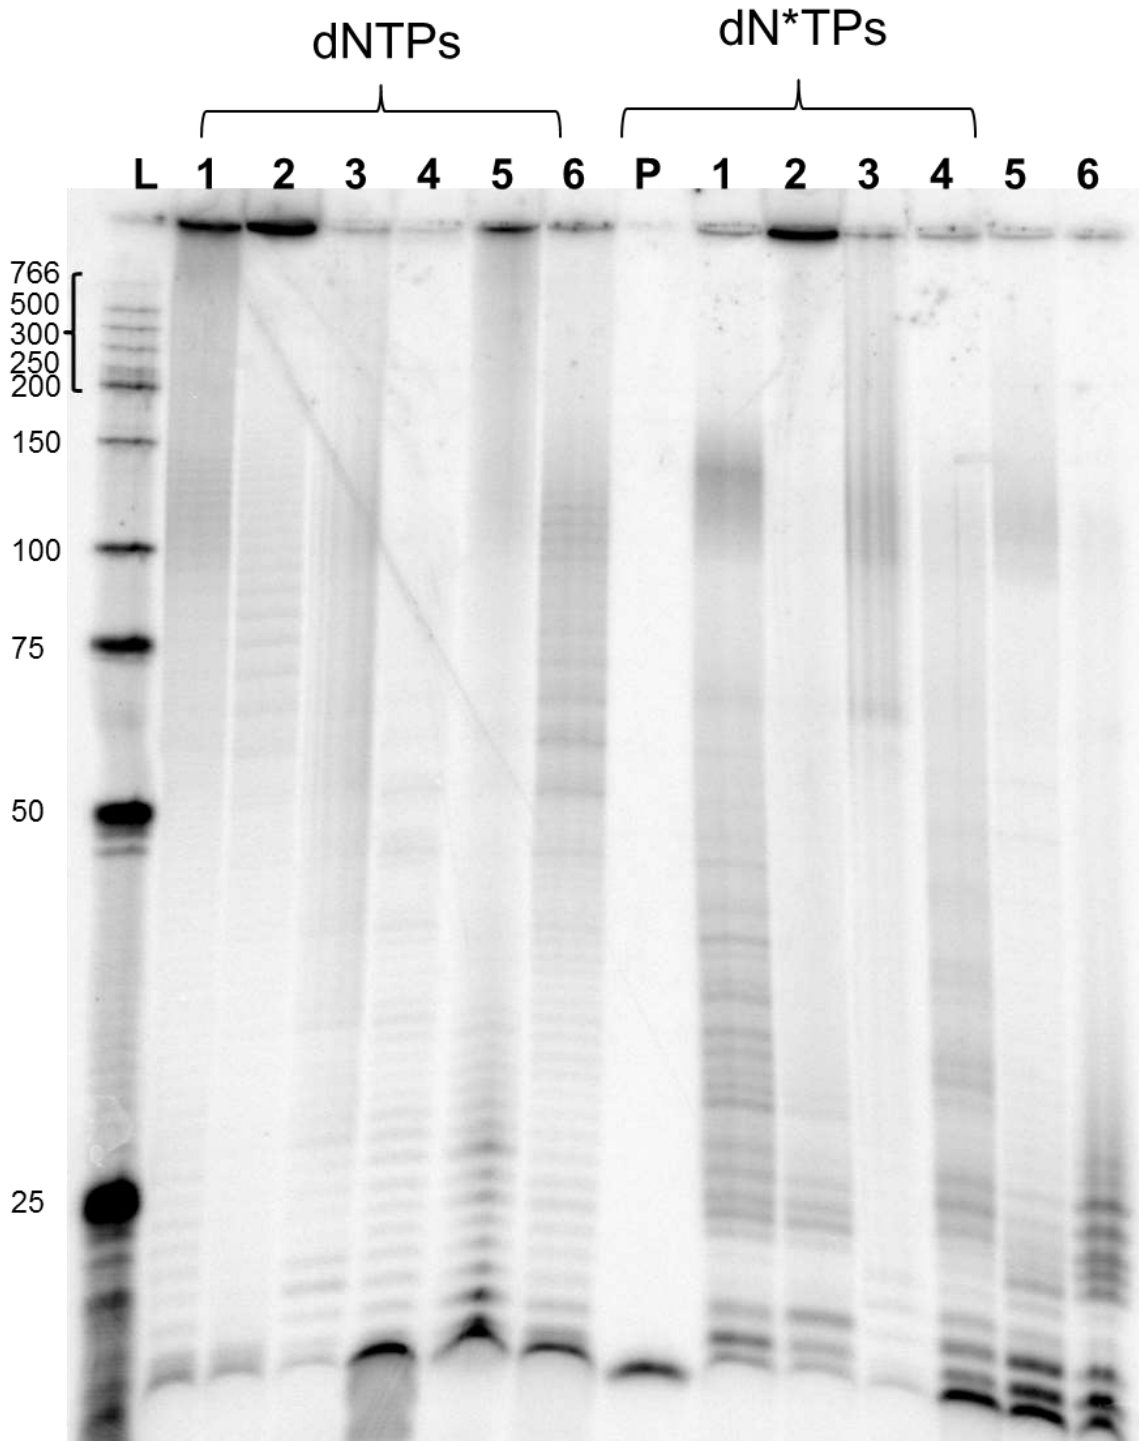

**Figure S5.** Gel image (PAGE 10%) of the products from the rolling circle amplification with circular template **cT3** and 2'-fluoro-rNTPs **5** (the close-up view of this gel is shown in Fig. 2C of the manuscript). DNA polymerases used: lane 1: Vent (*exo*<sup>-</sup>); lane 2: 9°N<sub>m</sub>; lane 3: Klenow fragment; lane 4: Φ29; lane 5: *Pfu*; lane 6: *Pwo*; P = control without polymerase; L: low molecular weight DNA ladder.



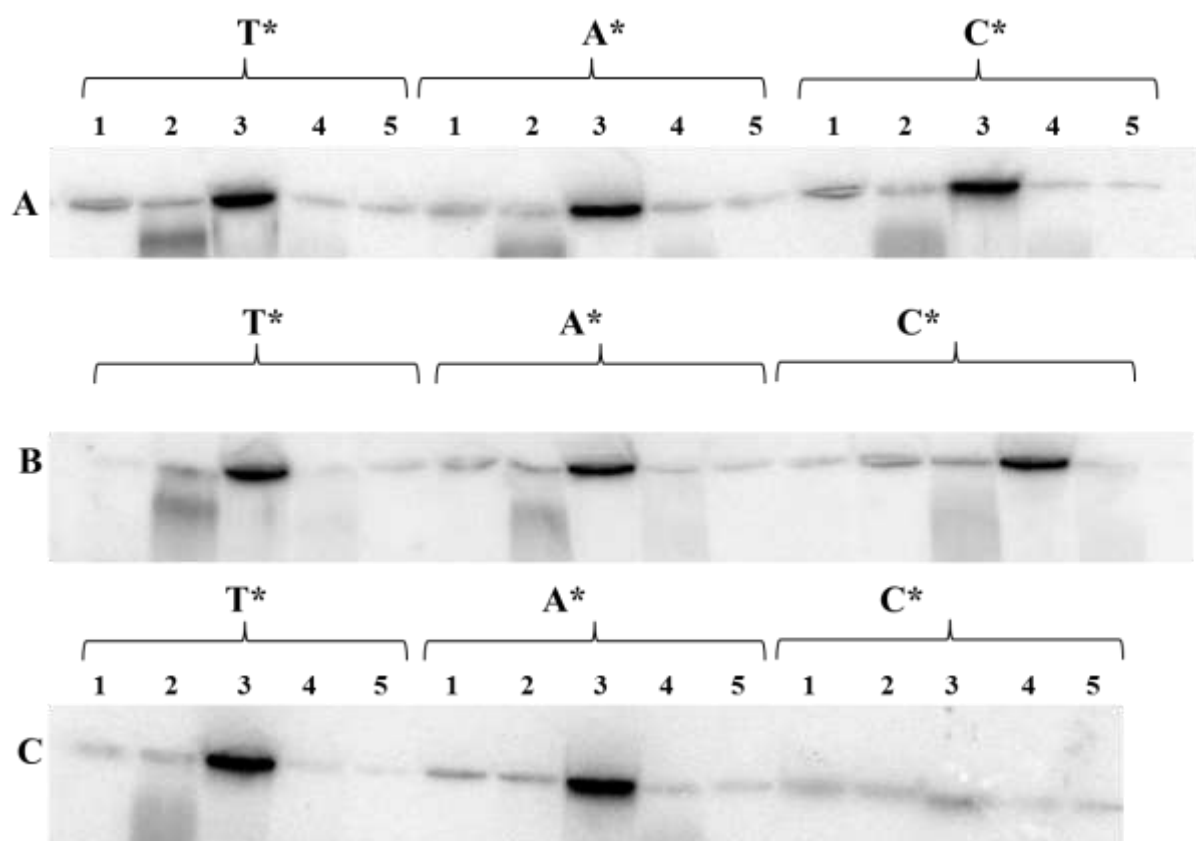

**Figure S6.** Gel images (close-up view; PAGE 10%) of RCA products with circular template **cT1**, primer **P1**, and single modified  $\alpha$ -thio dNTPs **6** (A), base-modified dNTPs **1-3** (B) and 2'-fluoro-rNTPs **5** (C). DNA polymerases used: lane 1: Klenow fragment; lane 2: Vent (*exo*<sup>-</sup>); lane 3: 9°N<sub>m</sub>; lane 4: *Pfu*; lane 5: *Pwo*;

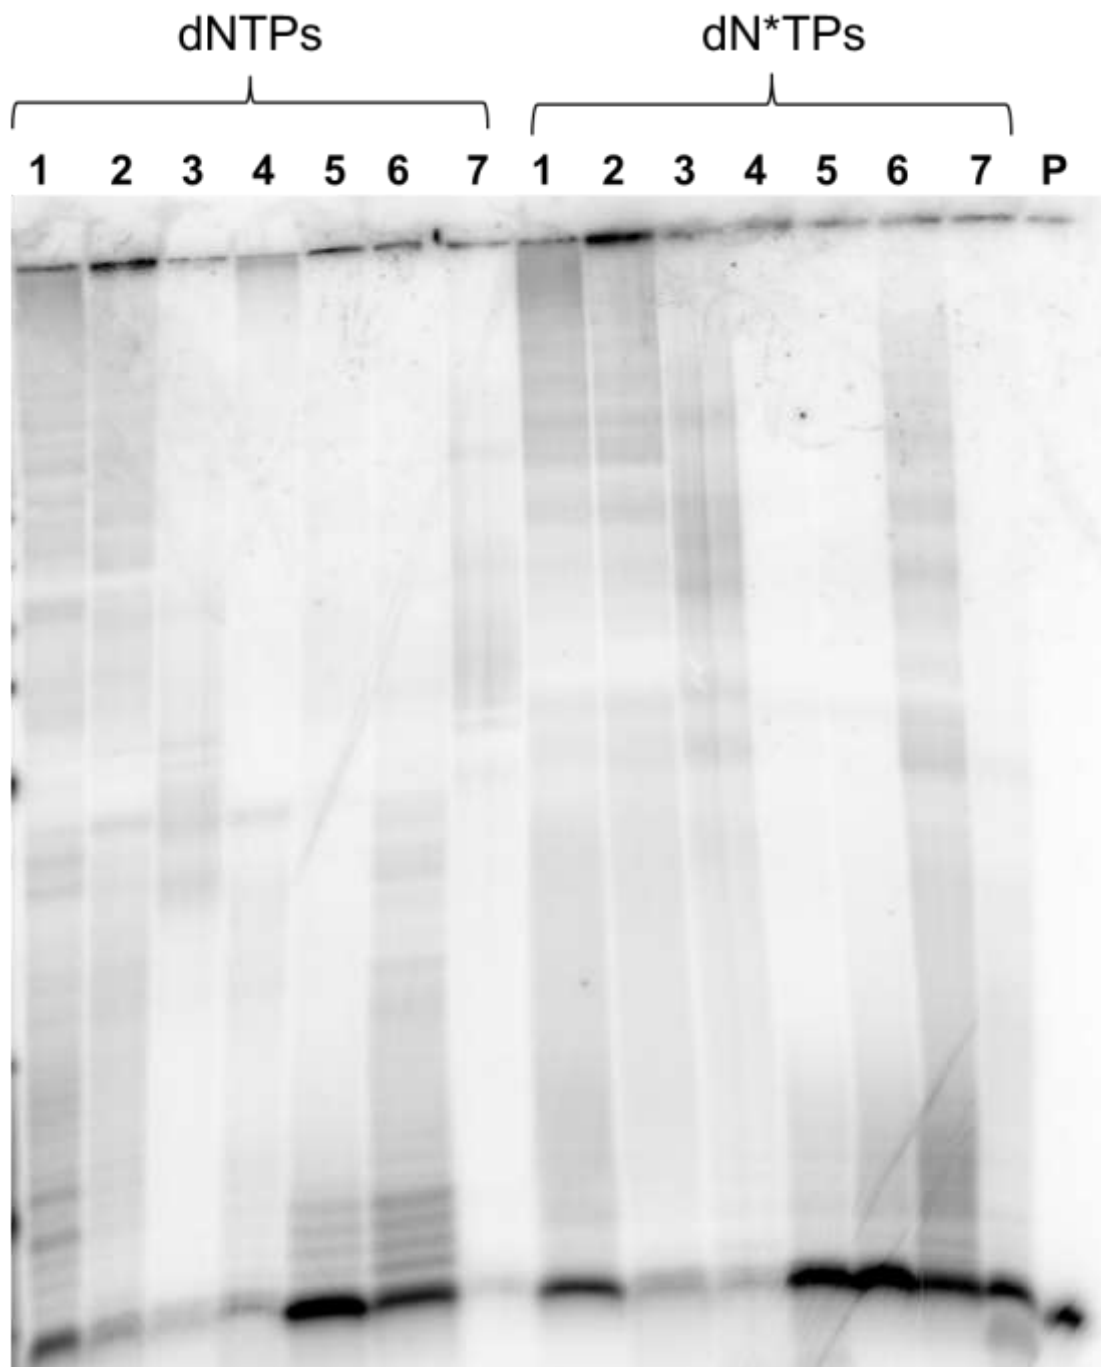

**Figure S7.** Gel image (PAGE 10%) of the products from the rolling circle amplification with circular template **cT1** and base-modified dNTPs **1-3**. DNA polymerases used: lane 1: Vent (*exo*<sup>-</sup>); lane 2: 9°N<sub>m</sub>; lane 3: Klenow fragment; lane 4: Φ29; lane 5: *Pfu*; lane 6: *Pwo*; lane 7: Sequenase; P = control without polymerase.

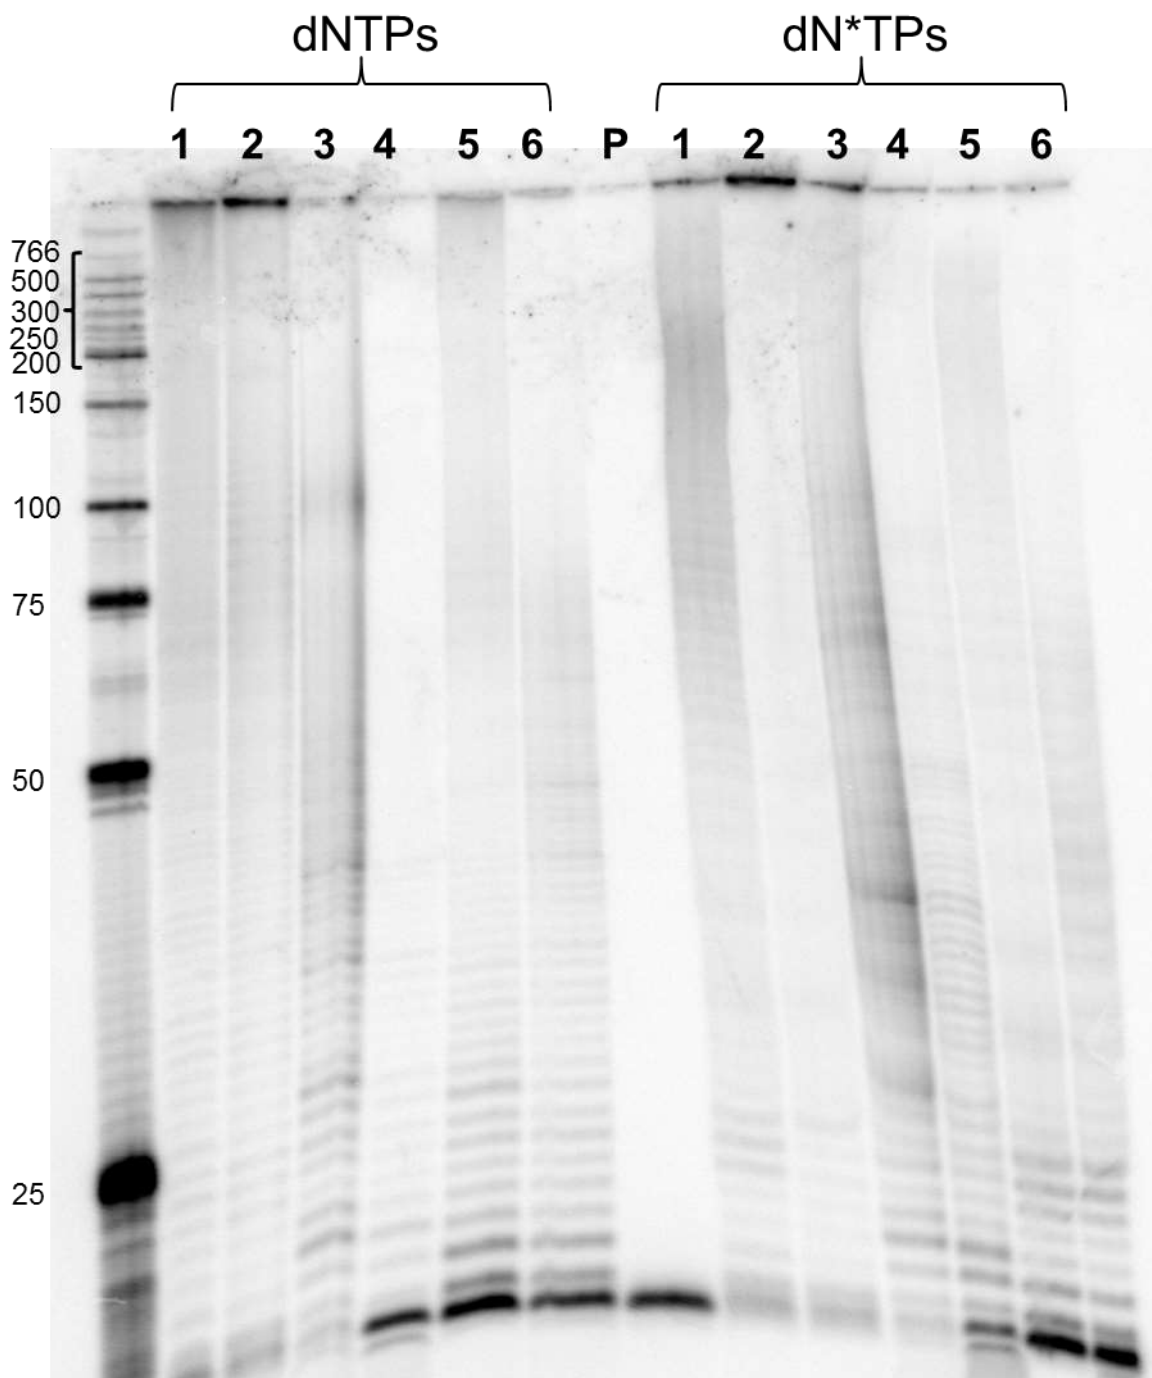

**Figure S8.** Gel image (PAGE 10%) of the products from the rolling circle amplification with circular template **cT1** and  $\alpha$ -thio dNTPs **6**. DNA polymerases used: lane 1: Vent (*exo*<sup>-</sup>); lane 2: 9°N<sub>m</sub>; lane 3: Klenow fragment; lane 4:  $\Phi$ 29; lane 5: *Pfu*; lane 6: *Pwo*; P = control without polymerase; L = low molecular weight DNA ladder.

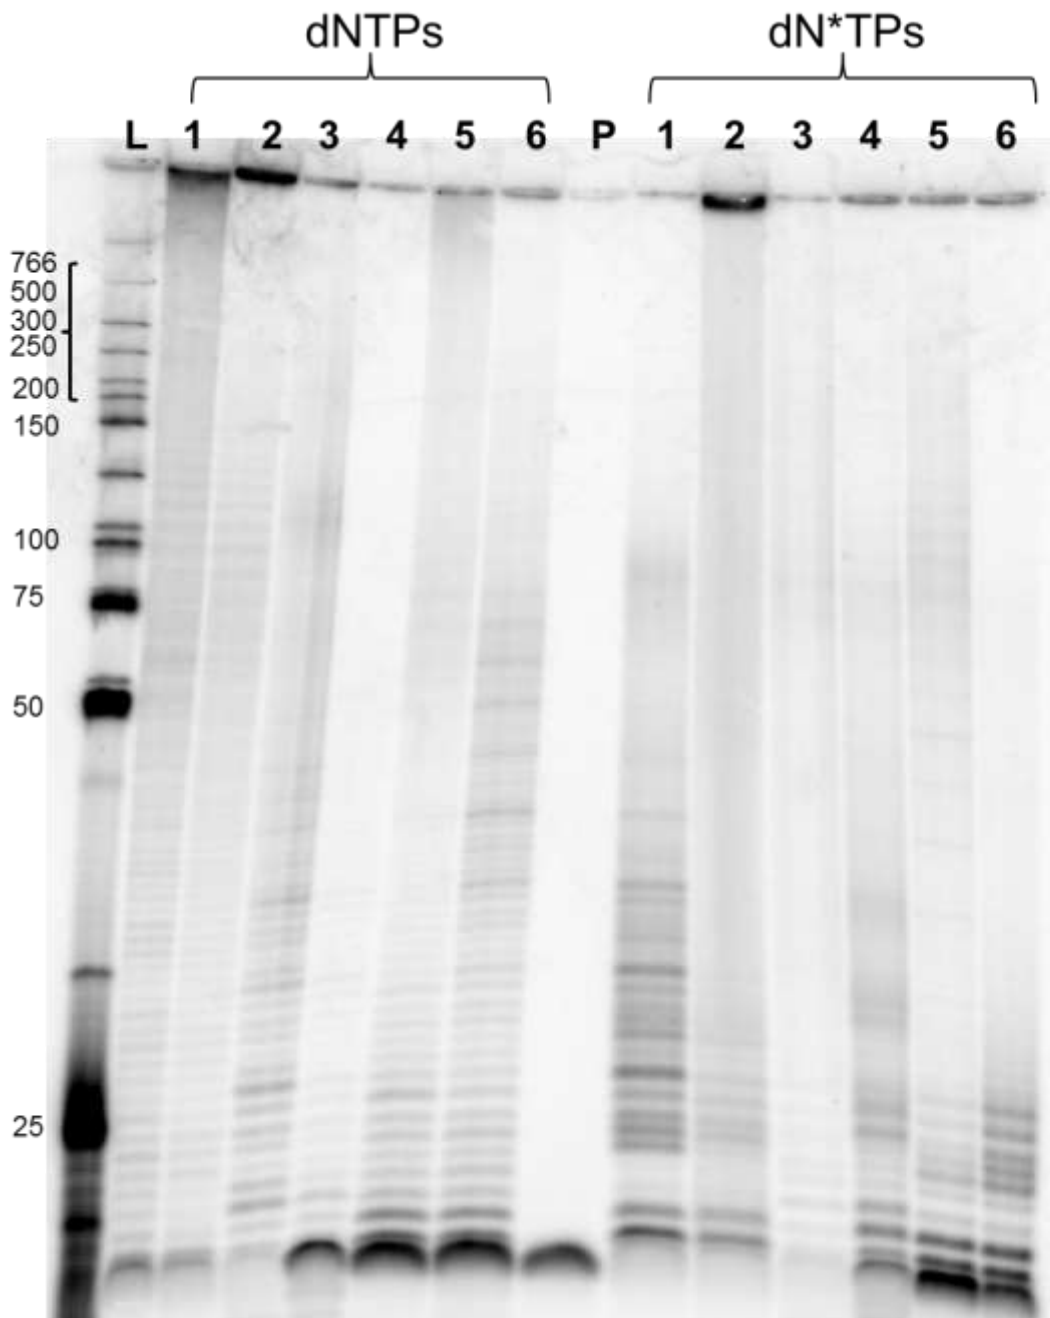

**Figure S9.** Gel image (PAGE 10%) of the products from the rolling circle amplification with circular template **cT1** and 2'-fluoro-rNTPs **5**. DNA polymerases used: lane 1: Vent (*exo*<sup>-</sup>); lane 2: 9°N<sub>m</sub>; lane 3: Klenow fragment; lane 4: Φ29; lane 5: *Pfu*; lane 6: *Pwo*; P = control without polymerase; L = low molecular weight DNA ladder.

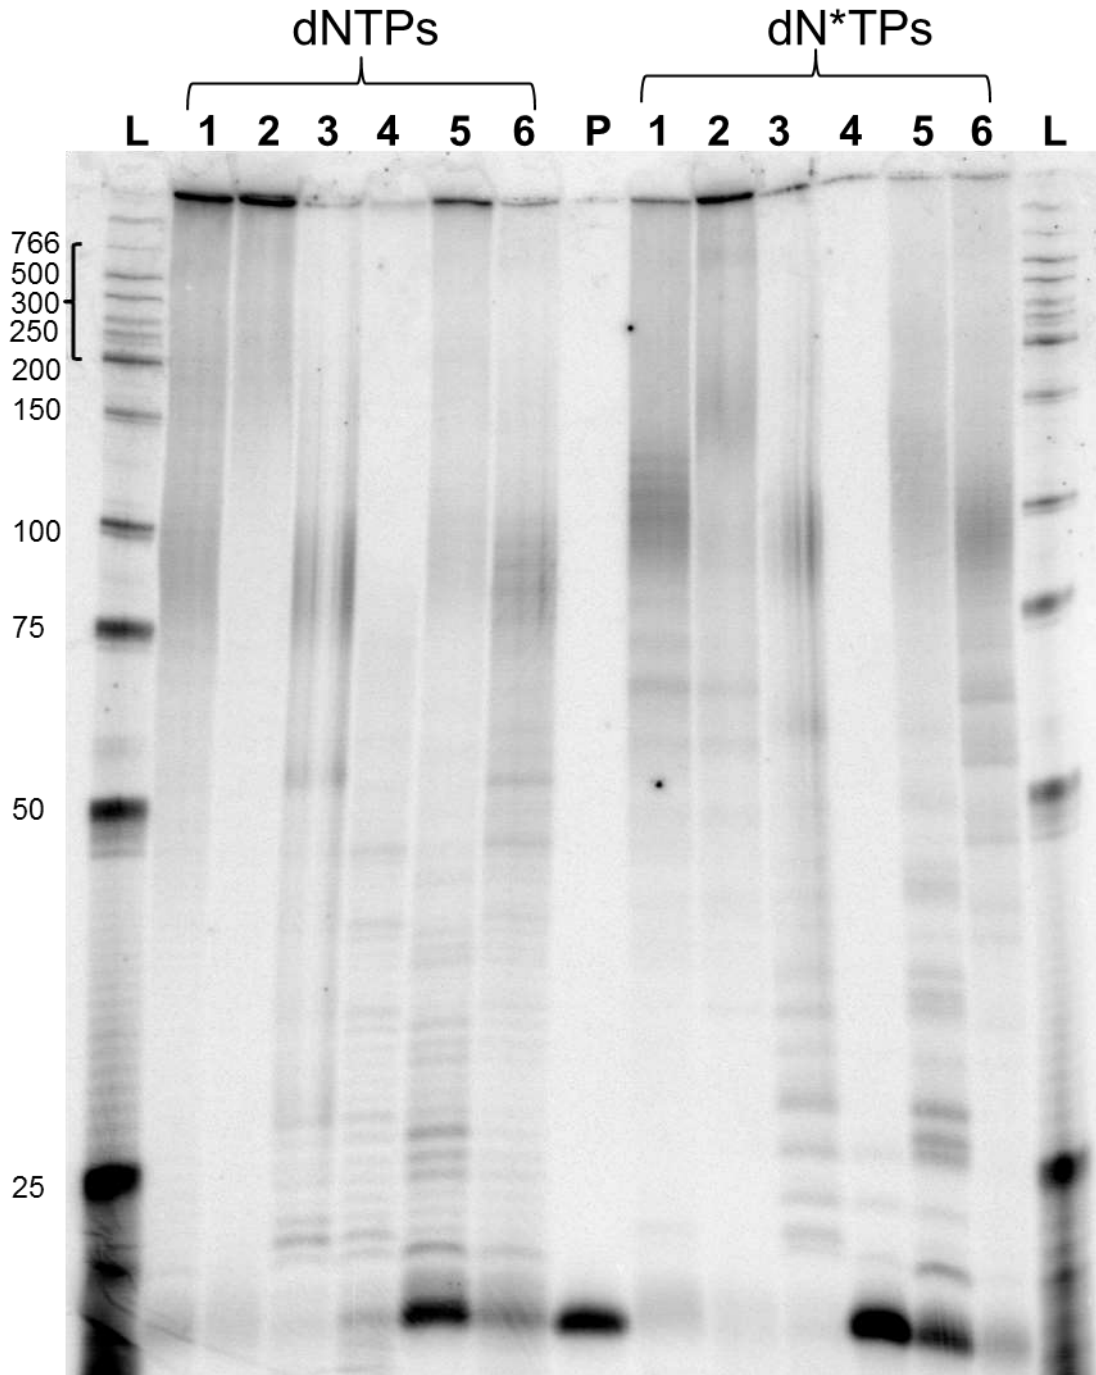

**Figure S10.** Gel image (PAGE 10%) of the products from the rolling circle amplification with circular template **cT2** and base-modified dNTPs **1-3**. DNA polymerases used: lane 1: Vent (*exo*<sup>-</sup>); lane 2: 9°N<sub>m</sub>; lane 3: Klenow fragment; lane 4: Φ29; lane 5: *Pfu*; lane 6: *Pwo*; lane 7: Sequenase; P = control without polymerase.

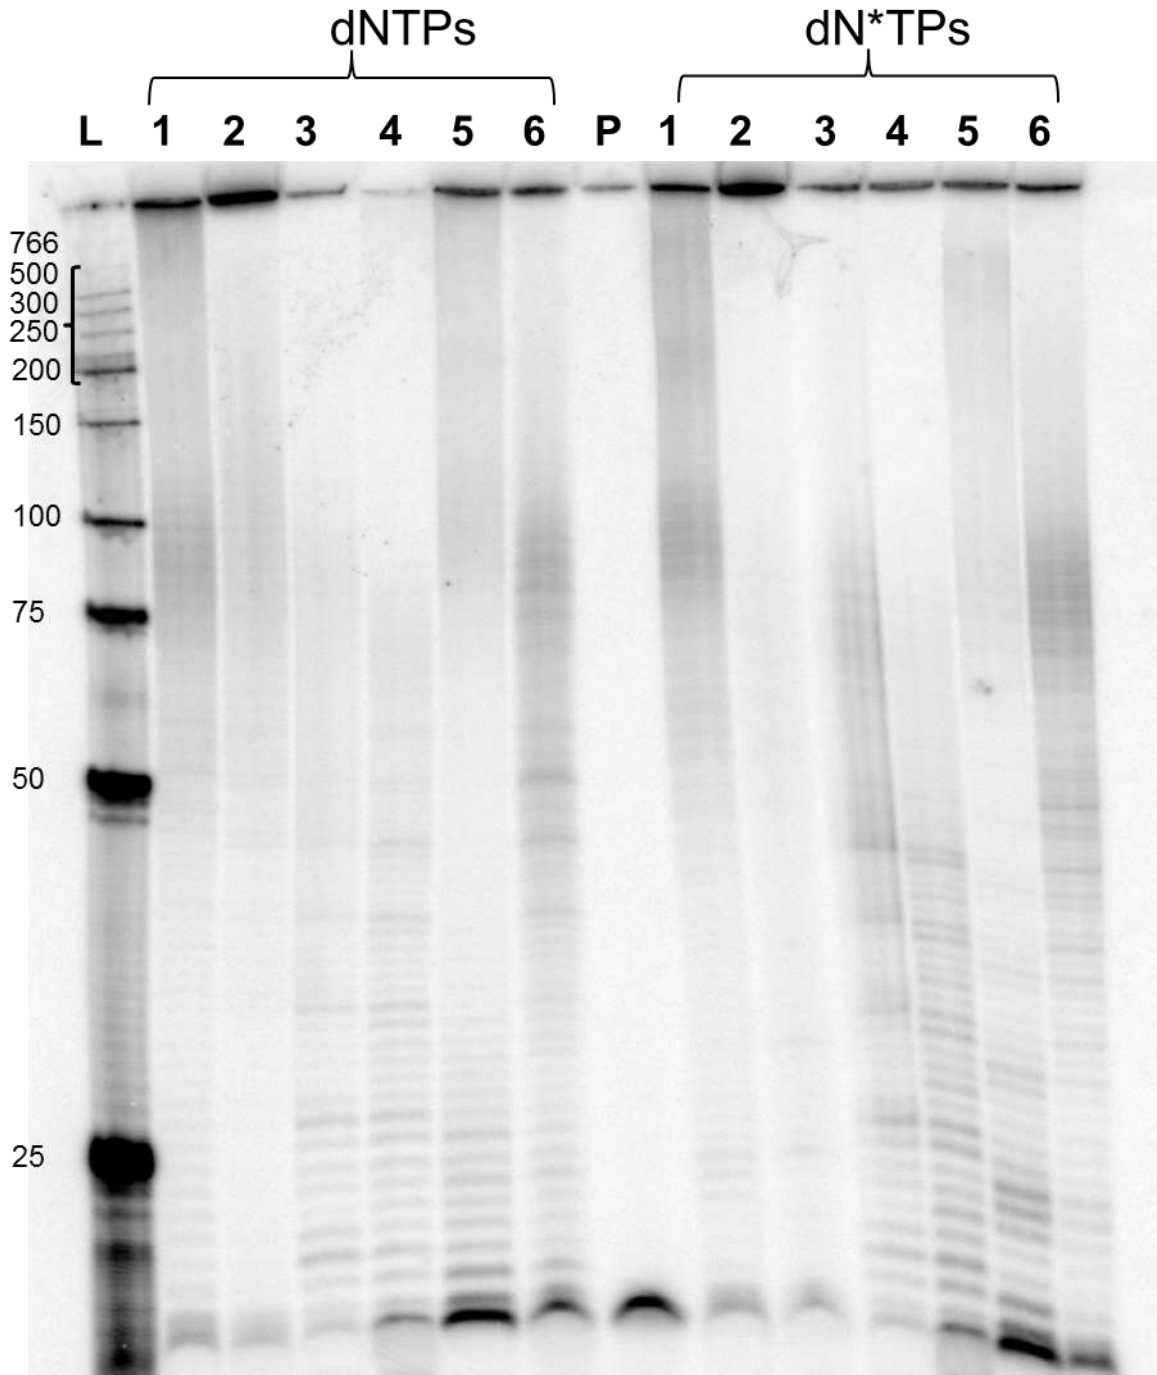

**Figure S11.** Gel image (PAGE 10%) of the products from the rolling circle amplification with circular template **cT2** and  $\alpha$ -thio dNTPs **6**. DNA polymerases used: lane 1: Vent (*exo*<sup>-</sup>); lane 2: 9°N<sub>m</sub>; lane 3: Klenow fragment; lane 4:  $\Phi$ 29; lane 5: *Pfu*; lane 6: *Pwo*; P = control without polymerase; L = low molecular weight DNA ladder.

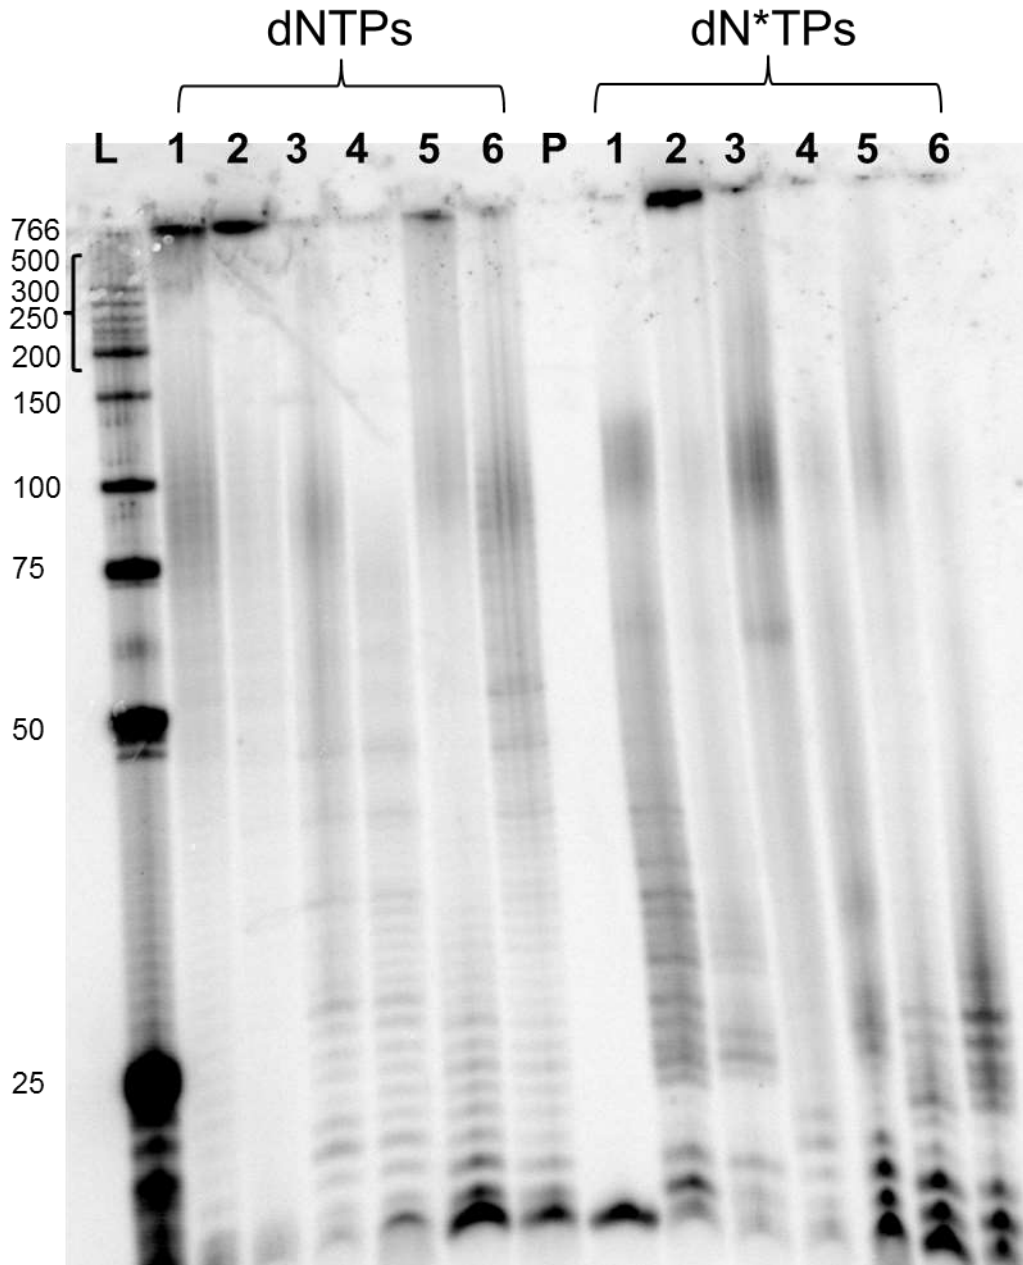

**Figure S12.** Gel image (PAGE 10%) of the products from the rolling circle amplification with circular template **cT2** and 2'-fluoro-rNTPs **5**. DNA polymerases used: lane 1: Vent (*exo*<sup>-</sup>); lane 2: 9°N<sub>m</sub>; lane 3: Klenow fragment; lane 4: Φ29; lane 5: *Pfu*; lane 6: *Pwo*; P = control without polymerase; L = low molecular weight DNA ladder.

**Table S1** Evaluation of the efficiency of RCA with different circular templates and nucleoside triphosphates.<sup>a</sup>

| Triphosphate used             | Template <b>cT1</b> | Template <b>cT2</b> | Template <b>cT3</b> |
|-------------------------------|---------------------|---------------------|---------------------|
| dN*TPs <b>1-3</b>             | 17.8                | 38.7                | 23.1                |
| 2'-fluoro-rNTPs <b>5</b>      | 4.6                 | 4.6                 | 2.4                 |
| $\alpha$ -thio dNTPs <b>6</b> | 26.9                | 32.4                | 28.2                |
| Natural dNTPs                 | 14.1                | 11.4                | 12.2                |

<sup>a</sup> Determined as the fraction of long RCA product formed over the sum of unused primer and shorter products.



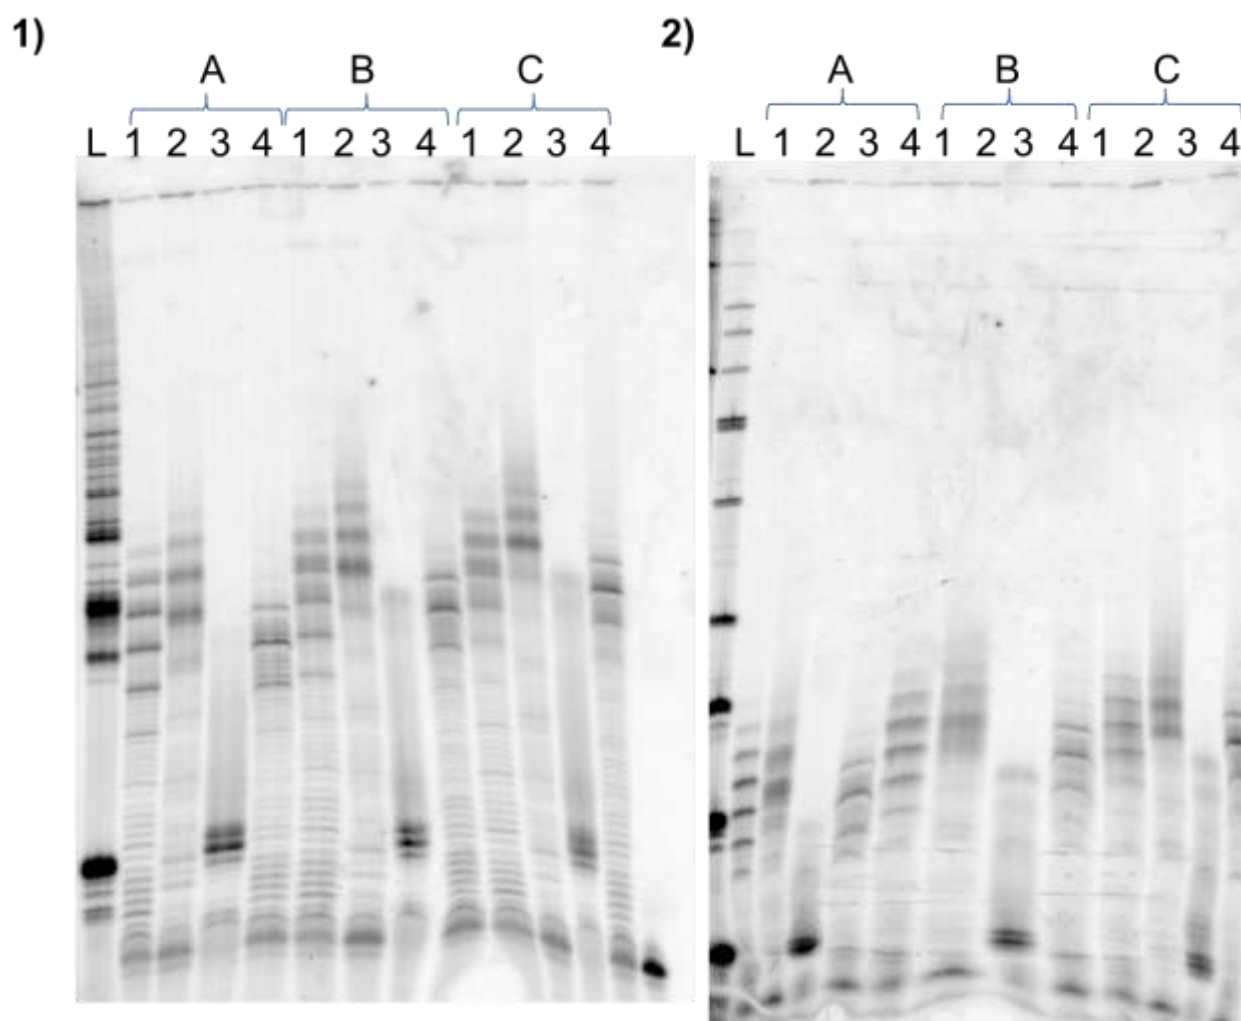

**Figure S13.** Primer extension reactions using the linear templates **T1** (A), **T2** (B) and **T3** (C) with primer **P1** and the  $9^\circ N_m$  DNA polymerase; the reactions were analyzed by 1) 10% PAGE and 2) 5% PAGE. Lane 1: natural dNTPs; lane 2: base-modified dN\*TPs **1-3**; lane 3: 2'-fluoro-rNTPs **5**; lane 4:  $\alpha$ -thio-dNTPs **6**; L: low molecular weight DNA ladder.

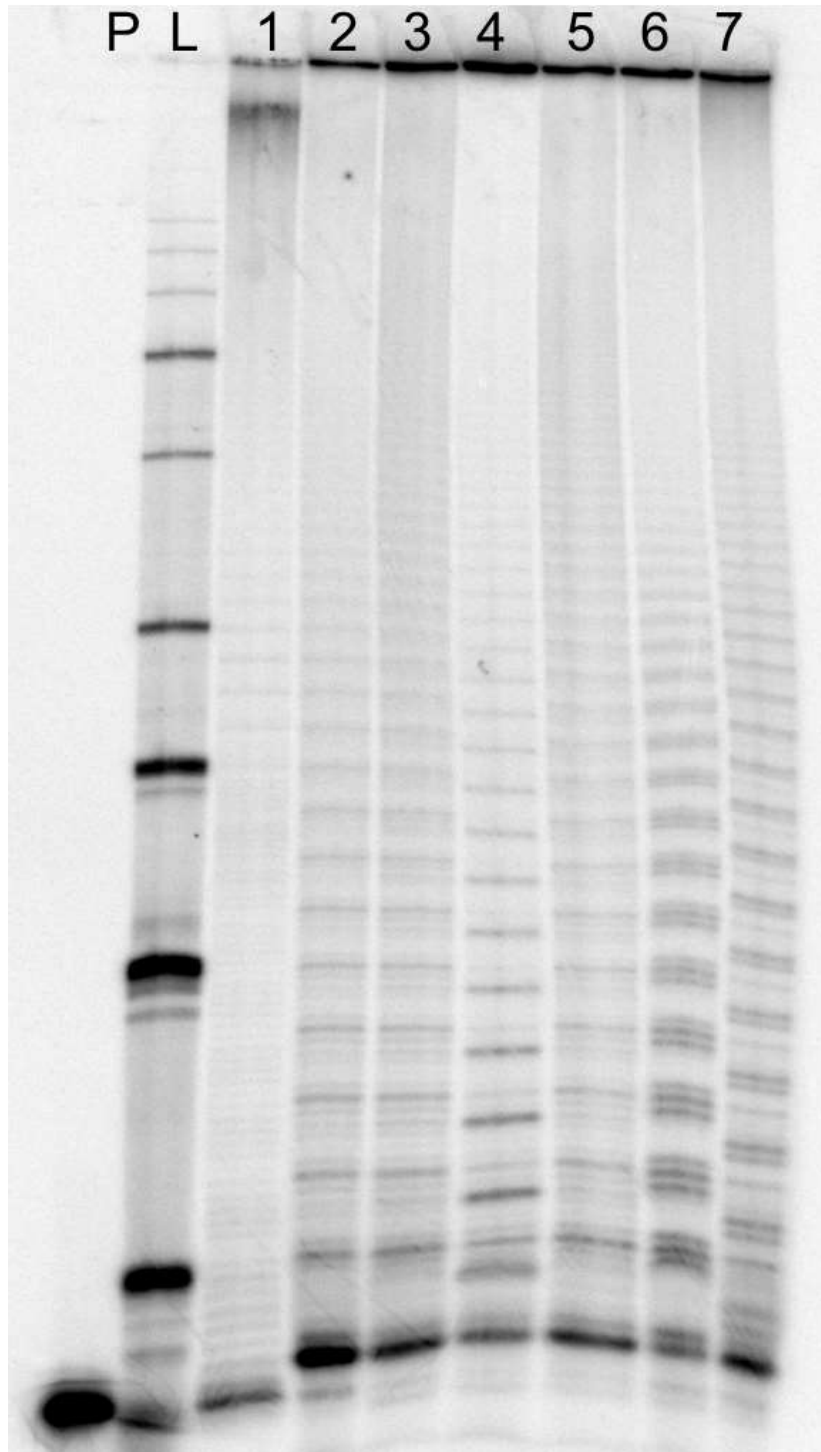

**Figure S14.** Gel image (PAGE 7%) of the sequencing reaction of the product stemming from the rolling circle amplification using template **cT1** and primer **P1** and natural dNTPs. **P**: primer **P3** (used for the sequencing reaction); **L**: low molecular weight DNA ladder; lane 1: untreated RCA product; lane 2: sequencing reaction without dNTPs and ddNTPs; lane 3: sequencing reaction only with dNTPs (i.e. no ddNTPs); Lane 4: with ddATP; Lane 5: with ddCTP; Lane 6: with ddGTP; Lane 7: with ddTTP.

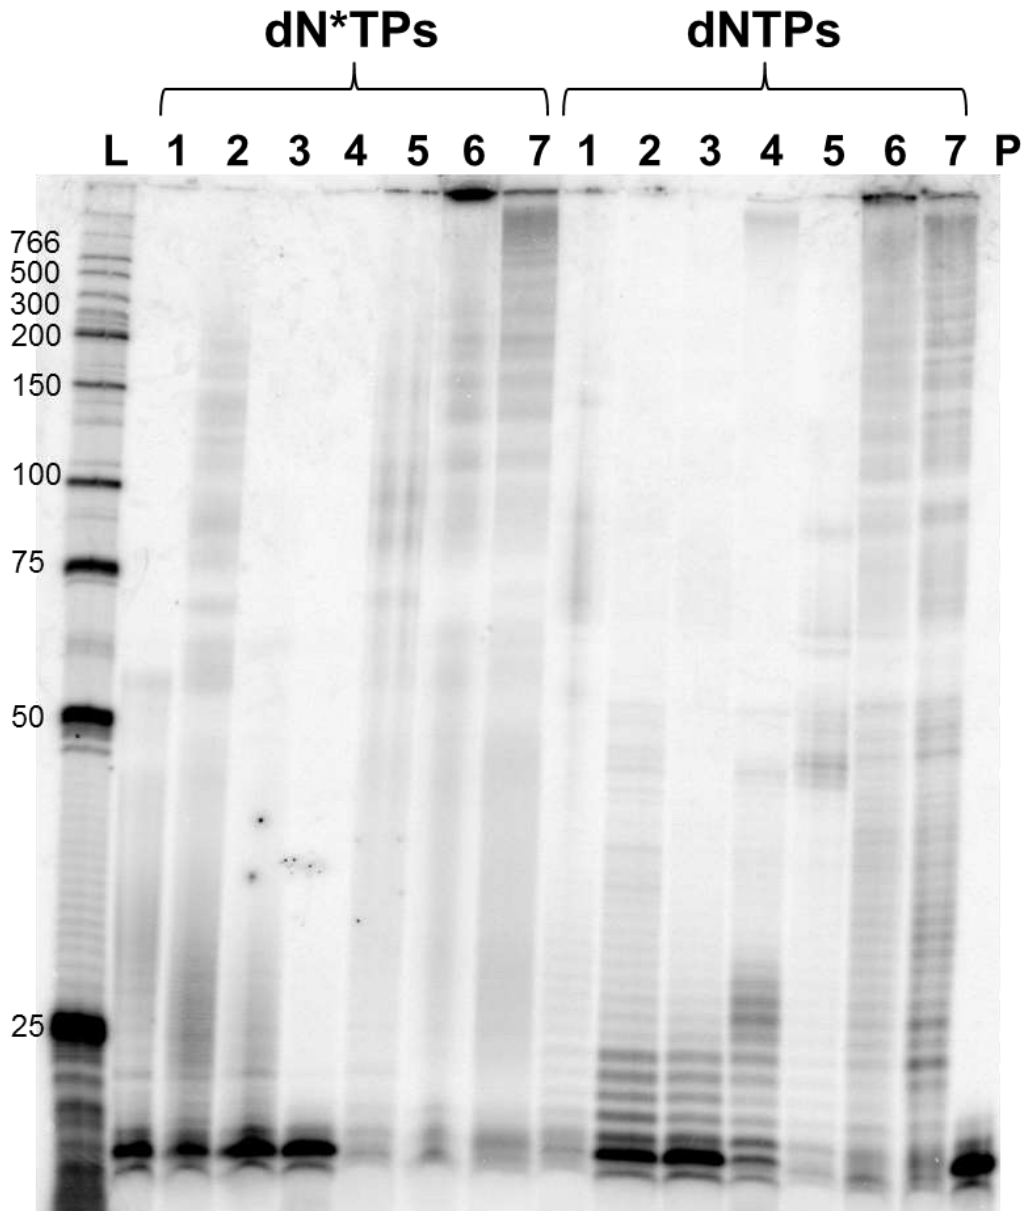

**Figure S15.** Gel image (PAGE 10%) of the products from the rolling circle amplification with circular template **cT4**, primer **P2**, and base-modified dNTPs **1-4**. DNA polymerases used: lane 1: Sequenase; lane 2: *Pwo*; lane 3: *Pfu*; lane 4:  $\Phi$ 29; lane 5: Klenow fragment; lane 6:  $9^{\circ}N_m$ ; lane 7: Vent (*exo*<sup>-</sup>); P = control without polymerase; L = low molecular weight DNA ladder.

**Table S2** Evaluation of the efficiency of RCA with template **cT4**, primer **P2**, and various polymerase and natural dNTPs

| Enzyme                           | Natural dNTPs (10 mM)       |                               |
|----------------------------------|-----------------------------|-------------------------------|
|                                  | Fraction of primer extended | Long RCA product <sup>a</sup> |
| Sequenase                        | 64.5 %                      | 15.3 %                        |
| <i>Pwo</i>                       | 25.9 %                      | 1.5 %                         |
| <i>Pfu</i>                       | 13.0 %                      | 0.2 %                         |
| Φ29                              | 60.0 %                      | 3.3 %                         |
| Klenow fragment                  | 77.1 %                      | 18.8 %                        |
| 9°N <sub>m</sub>                 | 85.6 %                      | 57.4 %                        |
| Vent ( <i>exo</i> <sup>-</sup> ) | 84.6 %                      | 32.0 %                        |

<sup>a</sup> Determined as the fraction of long RCA product formed over the sum of unused primer and shorter products

**Table S3** Evaluation of the efficiency of RCA with template **cT4**, primer **P2**, and various polymerase and four base-modified dNTPs

| Enzyme                           | Base-modified dNTPs (10 mM) |                               |
|----------------------------------|-----------------------------|-------------------------------|
|                                  | Fraction of primer extended | Long RCA product <sup>a</sup> |
| Sequenase                        | 34.9 %                      | 1.5 %                         |
| <i>Pwo</i>                       | 59.3 %                      | 1.1 %                         |
| <i>Pfu</i>                       | 13.8 %                      | 0.2 %                         |
| Φ29                              | 7.7 %                       | 0.7 %                         |
| Klenow fragment                  | 82.8 %                      | 35.5 %                        |
| 9°N <sub>m</sub>                 | 92.8 %                      | 87.8 %                        |
| Vent ( <i>exo</i> <sup>-</sup> ) | 85.8 %                      | 37.1 %                        |

<sup>a</sup> Determined as the fraction of long RCA product formed over the sum of unused primer and shorter products

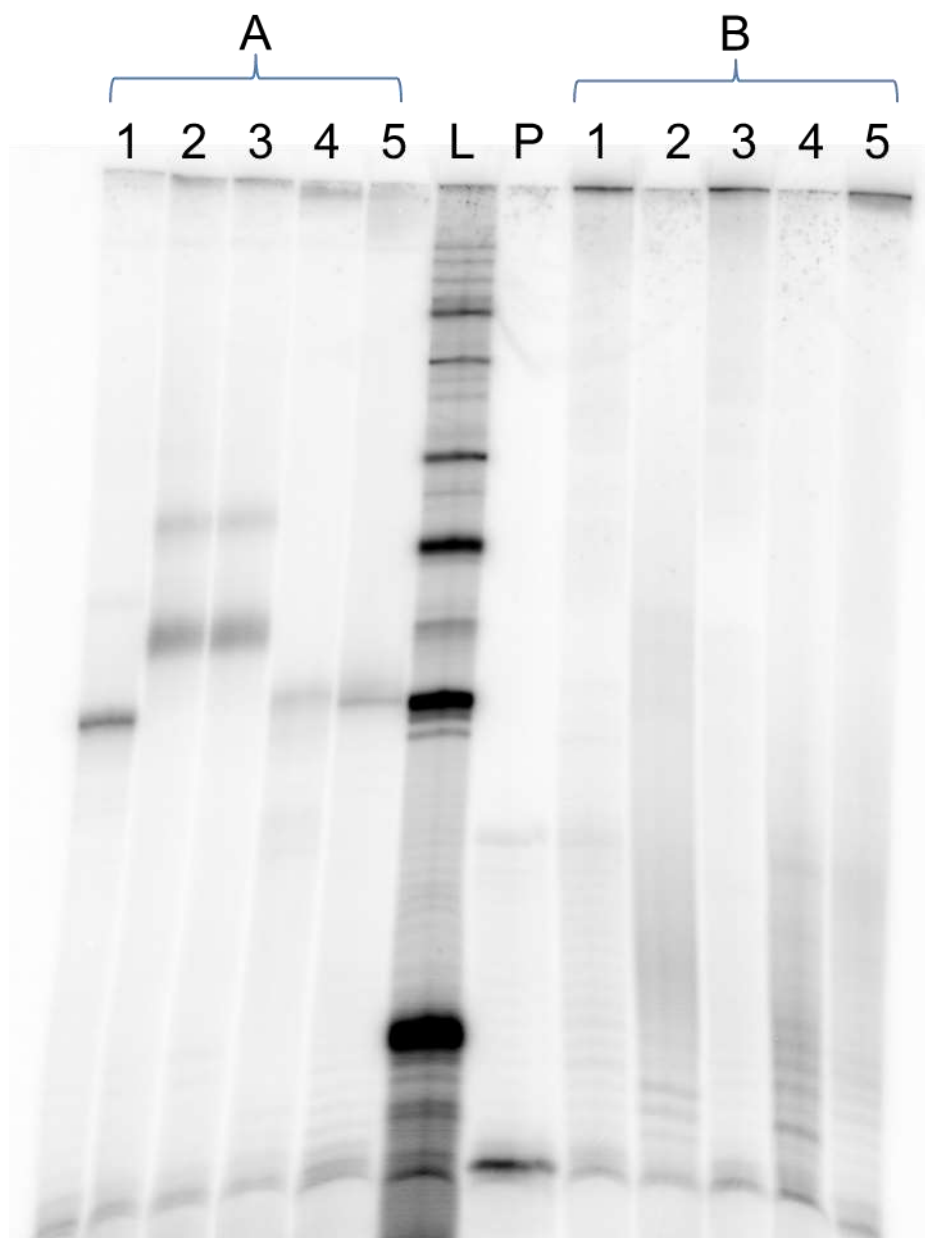

**Figure S16.** Gel image (PAGE 10%) of A) primer extension using the linear template **T4**, primer **P2** and the  $9^\circ N_m$  DNA polymerase, and B) RCA with template **cT4**, primer **P2**, and the  $9^\circ N_m$  DNA polymerase. Lane 1: natural dNTPs; lane 2: base-modified dN\*TPs **1-3**; lane 3: base-modified dNTPs **1-4**; lane 4: 2'-fluoro-rNTPs ; lane 5:  $\alpha$ -thio-dNTPs; L: low molecular weight DNA ladder; P: primer.

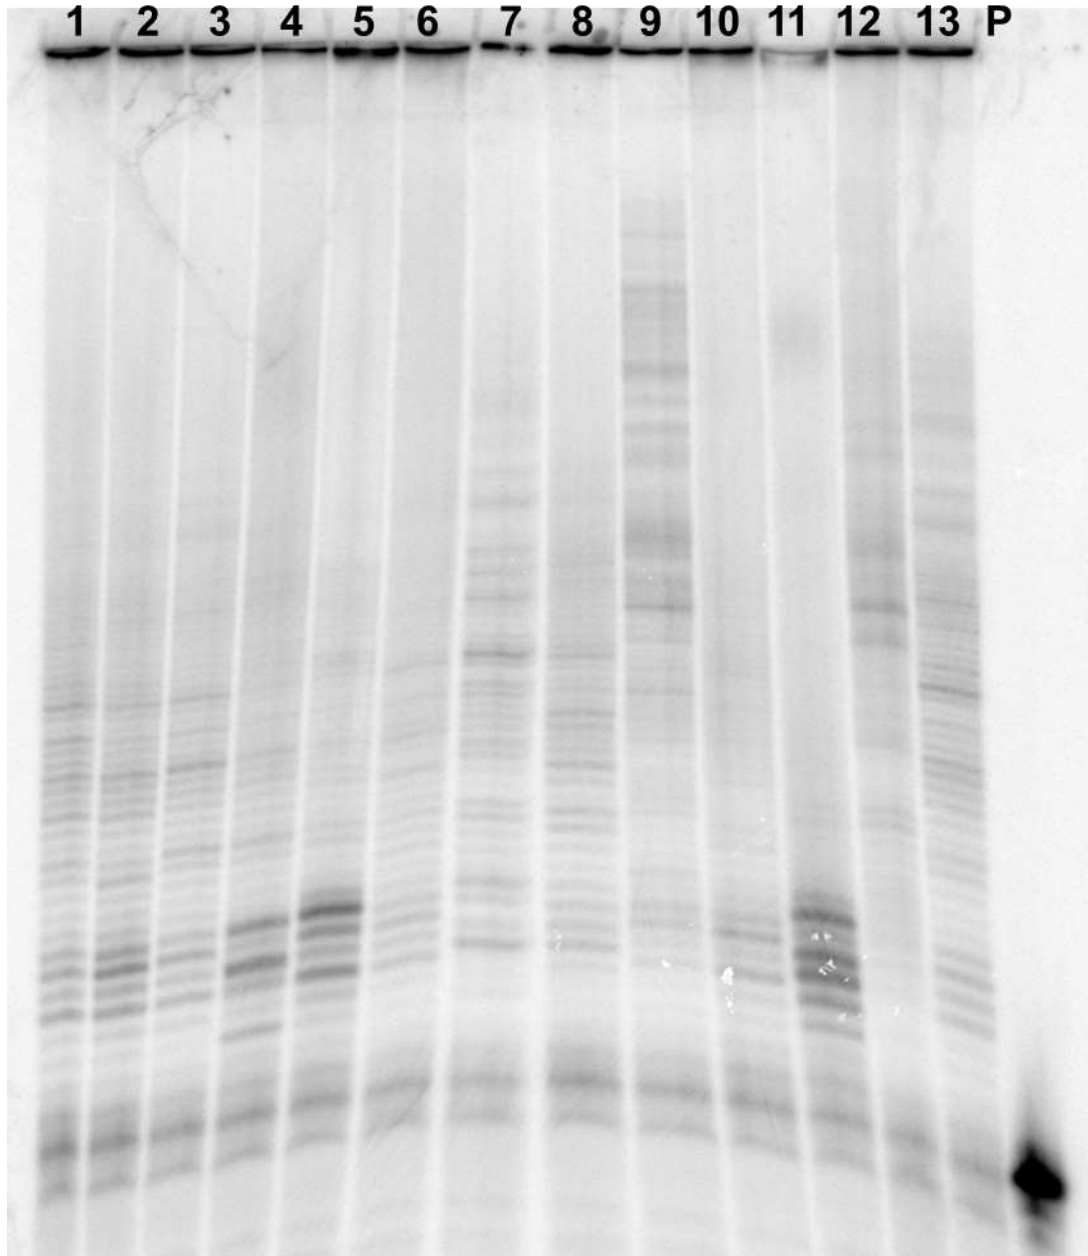

**Figure S17.** Gel image (PAGE 10%) of the products from the rolling circle amplification with circular template **cT5** and primer **P2**. Lanes **1-9** result from reaction mixtures containing one modified dN\*TP along with three natural dNTPs, while products in lanes **10-12** were generated using three modified dNTPs. Lane 1:  $\alpha$ -thio-dTTP; lane 2:  $\alpha$ -thio-dCTP; lane 3:  $\alpha$ -thio-dATP; lane 4: 2'-fluoro-TTP; lane 5: 2'-fluoro-CTP; lane 6: 2'-fluoro-ATP; lane 7: base-modified dUTP **2**; lane 8: base-modified dCTP **3**; lane 9: base-modified dATP **1**; lane 10: three  $\alpha$ -thio-dNTPs and dGTP; lane 11: three 2'-fluoro-rNTPs and dGTP; lane 12: three base-modified dNTPs and dGTP; lane 13: natural dNTPs; P: primer.

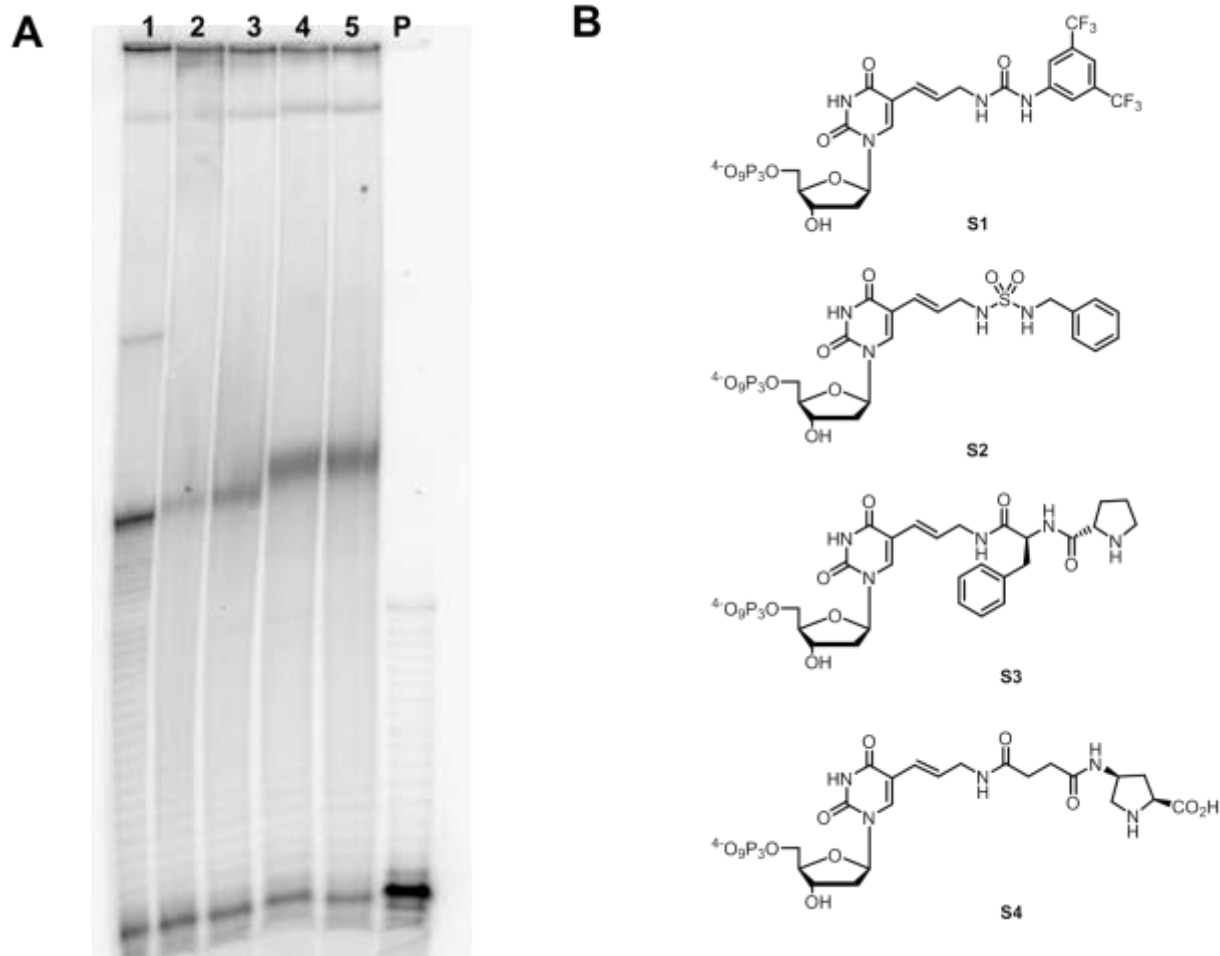

**Figure S18.** A) Gel image (PAGE 10%) of the fully modified products stemming from the rolling circle amplification with circular template **cT4**, primer **P2**, and the  $9^\circ N_m$  DNA polymerase. The dN\*TPs used were  $\alpha$ -thio-dATP,  $\alpha$ -thio-dCTP, 7-deaza-dGTP **4**, and the dU\*TPs shown in B). Lane 1: natural dNTPs; lane 2: dU\*TP = **S1**; lane 3: dU\*TP = **S2**; lane 4: dU\*TP = **S3**; lane 5: dU\*TP = **S4**; P : primer.

#### 4. References:

- [1] M. Hollenstein, *Chem. Eur. J.* **2012**, *18*, 13320-13330.
- [2] M. Hollenstein, *Org. Biomol. Chem.* **2013**, *11*, 5162-5172.
